# Supplementary material for: Hypoxia lowers SLC30A8/ZnT8 expression and free cytosolic Zn2+ in pancreatic beta cells
Source: PubMed Central journal article supplement (PMC4079946; doi:10.1007/s00125-014-3266-0), 2014-05-28
Supplement: 125_2014_3266_MOESM1_ESM.pdf [file 125_2014_3266_MOESM1_ESM.pdf]

**ESM Table 1 - Characteristics of human islet donors**

| No | Gender | Age (y) | BMI (kg/m <sup>2</sup> ) |
|----|--------|---------|--------------------------|
| 1  | F      | 46      | 26                       |
| 2  | F      | 43      | 34                       |
| 3  | M      | 20      | 23                       |
| 4  | M      | 49      | 24                       |
| 5  | M      | 46      | 36                       |
| 6  | M      | 52      | 27                       |
