# Supplementary material for: Hypoxia lowers SLC30A8/ZnT8 expression and free cytosolic Zn2+ in pancreatic beta cells
Source: PubMed Central journal article supplement (PMC4079946; doi:10.1007/s00125-014-3266-0), 2014-05-28
Supplement: 125_2014_3266_MOESM2_ESM.pdf [file 125_2014_3266_MOESM2_ESM.pdf]

**ESM Table 2 - Primer sequences used for qRT-PCR**

| Target   | Mouse (for/rev)                                  | Rat (for/rev)                                        | Human (for/rev)                              |
|----------|--------------------------------------------------|------------------------------------------------------|----------------------------------------------|
| Slc30a1  | ACTCAGTGTGCCCTGAAGCA<br>GCATCCTTCCCAGAATGCA      | CCCAGCTTCATACATGCAGGTG<br>CCTTGCTCTTCTCCCCTATATGCT   |                                              |
| Slc30a2  | CCCGACCAGCCACCAA<br>CCAAGGATCTCGGCTCGAT          |                                                      |                                              |
| Slc30a3  | GGTGGTTGGTGGGTATTTAGCA<br>CAAGTGGGCGGCATCAGT     | TCCTCTTCTCTATCTGCGCCC<br>TGTGCGGAGGCAACGTGGTAA       |                                              |
| Slc30a4  | CATCGCTGCCGTCTCTAC<br>ATTTGCCATGTATCCACCTACAAG   | GATCGGAGAGCTTGTAGGTGGATA<br>ACACCAGCATGACACTGATCATGG |                                              |
| Slc30a5  | CTGTTTGCTGCCCTGATGAG<br>CGGCCATACCCATAGGAGAA     |                                                      |                                              |
| Slc30a6  | TGAGCCCGGTTATTCTTCTGA<br>CCGCGATTAAGACCCAAACTAT  | GCTGACCGAAGGTCTTGGGAAGA<br>TAGGCAGCGCTAGGTCTCCTCAC   |                                              |
| Slc30a7  | ATGTTGCCCTGTCCATCAAGG<br>TCGGAGATCAAGCCTAGGCAGT  | ATGTTGCCCTGTCCATCAAGG<br>TCGGAGATCAAGCCTAGGCAGT      |                                              |
| Slc30a8  | CGCAGTTGATGGCGTGATC<br>TGGTTCACAGTCAGTGACCAGAT   | GGTGGACATGTTGCTGGGAG<br>CACCAGTCACCACCCAGATG         | TGGCCACAATCACAAGGAAGT<br>CAAGGGCATGCACAAAAGC |
| Slc30a9  | GTAGGGACATTGGCTGCTTAGG<br>TTCAACACAGGCTGGCTGAA   |                                                      |                                              |
| Slc30a10 | TTTCCCCTCCCTGGATCAG<br>ACACAGGCTCAAAGAAACGAGAT   |                                                      |                                              |
| Slc39a1  | CAGACGTGGTCAGGGACATTAG<br>TGTA CTGCCTGGCCTCTGACT |                                                      |                                              |
| Slc39a2  | TGGCGGCCACCATACAG<br>AACACCACAAGCCCCTTATG        | GTCTCTGCTTACCCTACACC<br>CTTCCTGTA CTATTCTGCACCA      |                                              |
| Slc39a3  | TGTCAGCTTCTCCTATGGCTTGT<br>GGATCCCGCCTGCACTAATA  | GAGGAGAATACATAAGAACAACCC<br>TCTGCTCAGCAGCTTGAG       |                                              |
| Slc39a4  | GGGCCGTGTGAAAAGTGTCT<br>GGCTTGT CAGGTTTGCCTAGA   | TCTTCAACCTCTTATTGCCCA<br>CTCCTCTGT CACCAAGTCTG       |                                              |
| Slc39a5  | CGAGCTGCCCCACGAA<br>AAAGGATAACCCCTCCTGAAGCA      | TAGACTCAGGTACAATCCTCAG<br>GCAGTCAATGTCCCATTCTC       |                                              |
| Slc39a6  | ACATTGGCCTGGATGGTGT<br>AAGGCCGTCACTGAAATTGTG     | AGTTTAACTATCTCTGTCCAGCC<br>CTTGCATGAGAATGTGGGAG      |                                              |
| Slc39a7  | GCTGGGTCCTGCCATTCA                               | GGATTGTGCTCCTTTCTTGTG                                |                                              |

|          |                                                   |                                                    |                                              |
|----------|---------------------------------------------------|----------------------------------------------------|----------------------------------------------|
|          | CAGCACAGACACTGTTGCTACGT                           | AAGGACACTCATGCCTATCC                               |                                              |
| Slc39a8  | GTACGCAGGAGACATCGAATTG<br>TGCCTTCCCGCGTTGA        | TGGCAGATATGTTTCCAGAG<br>CAAGGTGATGAGCAAGATGG       |                                              |
| Slc39a9  | GGACCAGGCTGGCTTCAAA<br>CCAGCTCTAAGGAGGCAGAAAC     | AGCAGCAGAAATATCAGTTGTC<br>TGATTCTGGATCGTCAGTGG     |                                              |
| Slc39a10 | GCCCTTCACCAGAGACCAATAA<br>CCTCCTGACCTTCACTGACTTCA | CCAACATGAATGTTTGAACGTC<br>AAGGAGAGCAGACTAATAACGG   |                                              |
| Slc39a11 | CTCACCTGGGTGCTACAGAAGAC<br>CAATGCAGGGTCCAAGTTCA   | ATGCTTCAAGGTTACAGCTC<br>ATCTAAGATCCGCCTCTGC        |                                              |
| Slc39a12 | GGTTGTAAATTTGTCTGCATGAA<br>TTGGGCTTGGGTTGTGTTG    | TATTTCTTCAGAACCACAGCAG<br>CGTGCTATAACCATATTTCTCCAG |                                              |
| Slc39a13 | AGGAATGTCAACTGGAAGAATGC<br>GGTGTGAGCCAAGGCAAATAGT | CAAAGGAGTAGAGGAGACGG<br>CATCTTCTCCAAGAGGTCAG       |                                              |
| Slc39a14 | GAGTGGGCCGGGATAATGTT<br>AAAGCACGTGGAGAGGTTTCCT    |                                                    |                                              |
| Mt-1     | CTGCACTTGCACCAGCTC<br>GGAGCAGCAGCTCTTCTTG         |                                                    | CTCGAAATGGACCCCAACT<br>ATATCTTCGAGCAGGGCTGT  |
| Mt-2     | AAGAAAAGCTGCTGCTCCTG<br>CACTTGTGCGGAAGCCTCTTT     |                                                    | CCGACTCTAGCCGCCTCTT<br>GTGGAAGTCGCGTTCTTTACA |
| Mt-3     | CCCTGCCGGATGTGAGAA<br>CCCCCTCTTCACCTTTGCA         |                                                    |                                              |
| Ins1     | GAAGCGTGGCATTGTGGAT<br>TGGGCCTTAGTTGCAGTAGTTCT    |                                                    |                                              |
| Gck      | GCTTTTGAGACCCGTTTTGTG<br>GCCTTCGGTCCCCAGAGT       |                                                    |                                              |
| Slc2a1   | CAGTTCGGCTATAAACTGGTG<br>GCCCCGACAGAGAAGATG       |                                                    |                                              |
| Slc2a2   | CATGCTGAGCTCTGCTGAAG<br>ACAGTCCAACGGATCCACTC      |                                                    |                                              |
| Pfk      | ATGGCAAAGCTATCGGTGTC<br>ACACAGTCCCATTTGGCTTC      |                                                    |                                              |
| Pdk1     | GGACTTCGGGTGAGTGAATGC<br>TCCTGAGAAGATTGTCGGGGA    |                                                    |                                              |
| Ldha     | TGTCTCCAGCAAAGACTACTGT<br>GACTGTACTTGACAATGTTGGGA |                                                    |                                              |
| Slc16a3  | GGCTGTTTTATCATCACGGGTT<br>GTGTGCTGTAGCCAATCCC     |                                                    |                                              |

|               |                                                   |  |  |
|---------------|---------------------------------------------------|--|--|
| Vegfa         | GTACCTCCATGCCAAGT<br>ACTCCAGGGCTTCATCGTTA         |  |  |
| Pdx1          | CATCCTATCCTCGGCCAATG<br>CATTTCGGTTGCCCAGGAA       |  |  |
| Cyclophilin A | TATCTGCACTGCCAAGACTGTA<br>CCACAATGCTCATGCCTTCTTCA |  |  |
