# Supplementary material for: Hypoxia lowers SLC30A8/ZnT8 expression and free cytosolic Zn2+ in pancreatic beta cells
Source: PubMed Central journal article supplement (PMC4079946; doi:10.1007/s00125-014-3266-0), 2014-05-28

**ESM Figure 1**

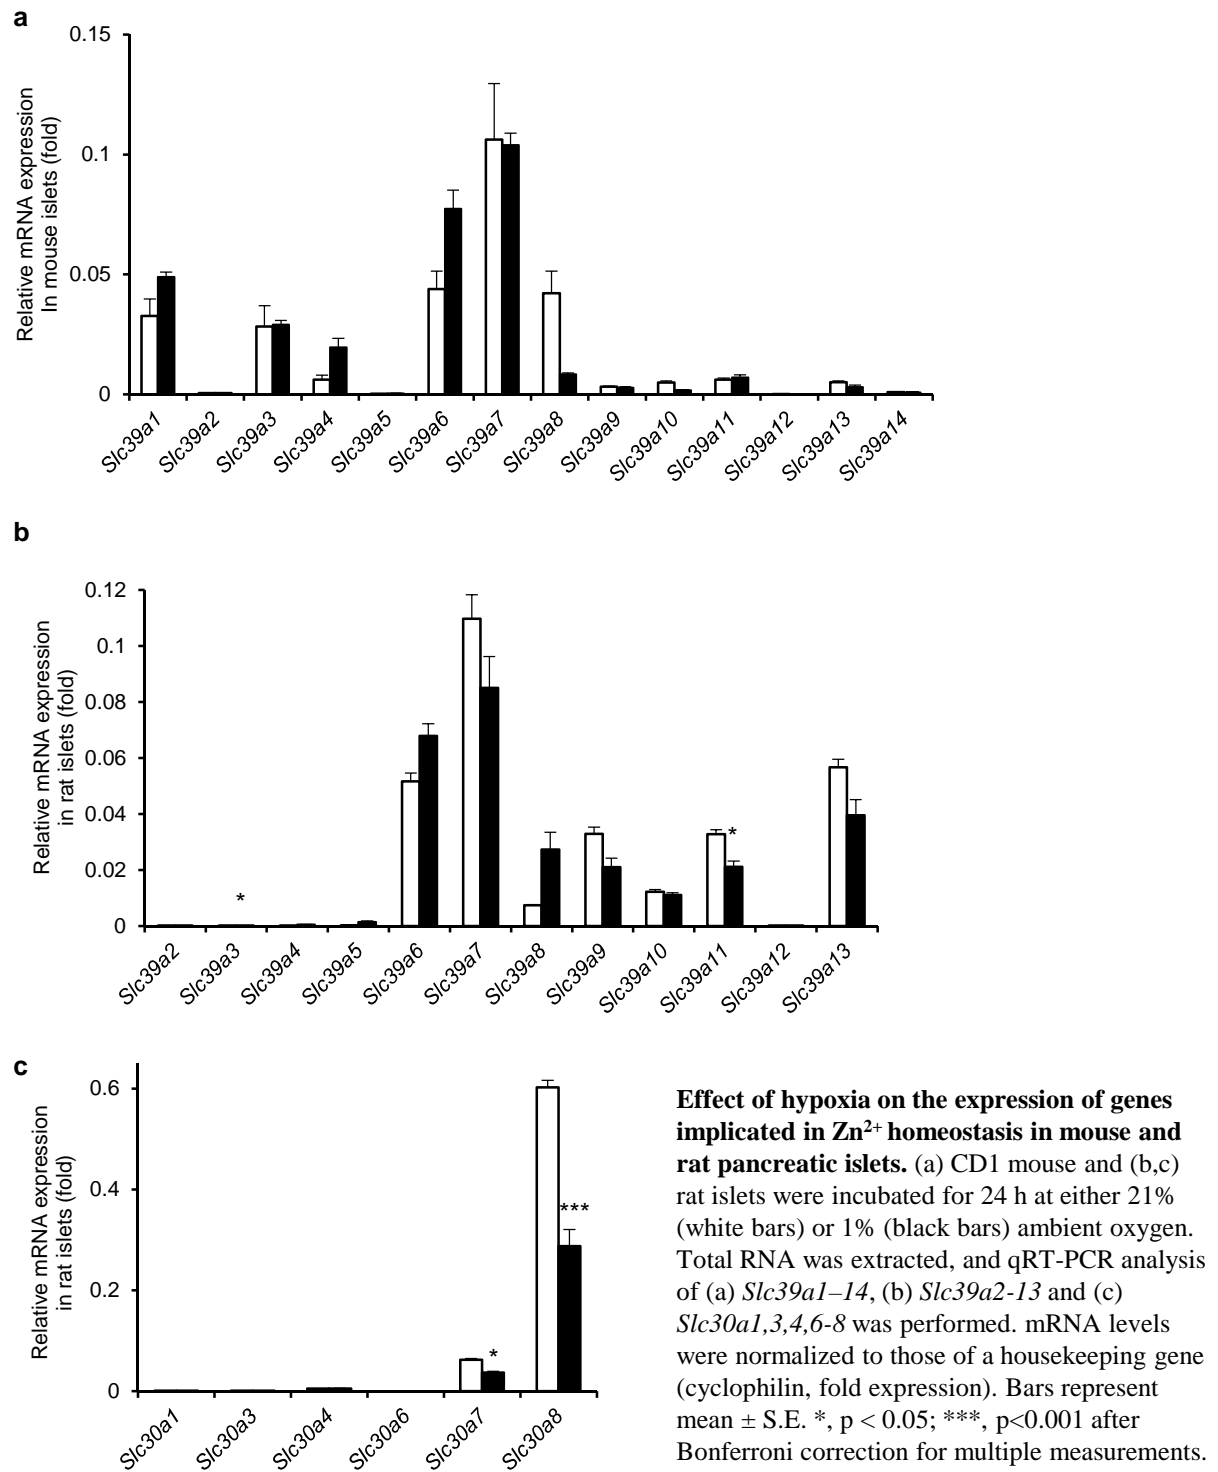

Supplement: 125_2014_3266_MOESM3_ESM.pdf [file 125_2014_3266_MOESM3_ESM.pdf]
