# Supplementary material for: Hypoxia lowers SLC30A8/ZnT8 expression and free cytosolic Zn2+ in pancreatic beta cells
Source: PubMed Central journal article supplement (PMC4079946; doi:10.1007/s00125-014-3266-0), 2014-05-28
Supplement: 125_2014_3266_MOESM4_ESM.pdf [file 125_2014_3266_MOESM4_ESM.pdf]

ESM Figure 2

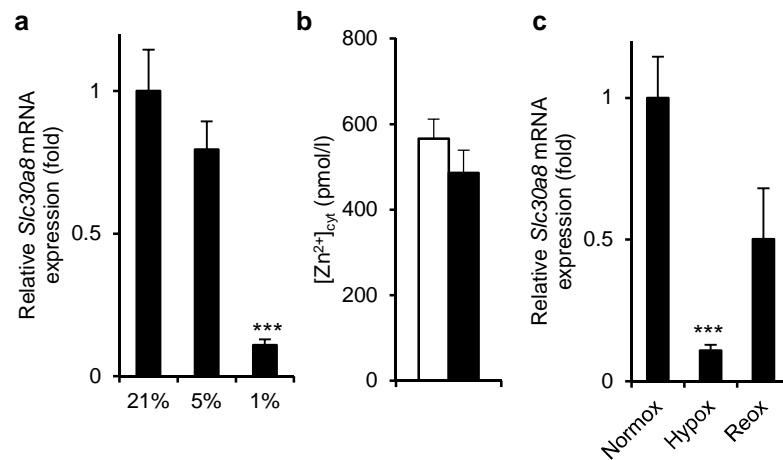

**Effects of different Oxygen concentrations and reoxygenation on ZnT8 expression and cytosolic Zn<sup>2+</sup> concentration.** (a) CD1 mouse islets were incubated at either 21%, 5% or 1% ambient oxygen for 24 h. Total RNA was analysed using qRT-PCR. Expression of *Slc30a8* was determined (fold expression, normalisation to cyclophilin). (b) Dissociated CD1 mouse islets were incubated at either 21% ambient oxygen (white bars) or at 1% ambient oxygen for 24 h with consecutive reoxygenation (21%) for 24 h (black bar). [Zn<sup>2+</sup>]<sub>cyt</sub> was measured after infection with eCALWY-4-expressing adenovirus. (c) CD1 mouse islets were incubated at either 21% ambient oxygen (Normox), 1% ambient oxygen for 24 h (Hypox) or 1% ambient oxygen for 24 h with consecutive reoxygenation (21% oxygen) for 24 h (Reox). Total RNA was analysed using qRT-PCR. Expression of *Slc30a8* was determined (normalisation to cyclophilin). Bars represent mean ± S.E. \*\*\*, p < 0.001.
