# Supplementary material for: Hypoxia lowers SLC30A8/ZnT8 expression and free cytosolic Zn2+ in pancreatic beta cells
Source: PubMed Central journal article supplement (PMC4079946; doi:10.1007/s00125-014-3266-0), 2014-05-28
Supplement: 125_2014_3266_MOESM7_ESM.pdf [file 125_2014_3266_MOESM7_ESM.pdf]

ESM Figure 5

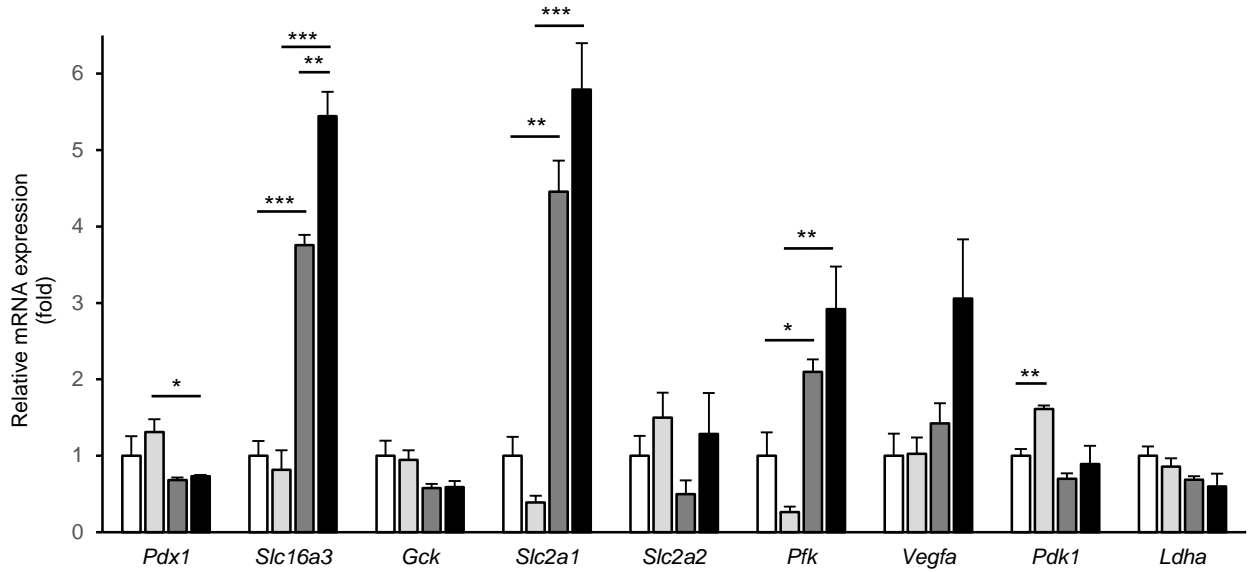

**Effect of ZnT8 deletion and hypoxia on the expression of genes involved in glucose mediated insulin secretion and the response to hypoxia in pancreatic beta cells.** ZnT8<sup>+/+</sup> and ZnT8<sup>-/-</sup> mouse islets were incubated at either 21% ambient oxygen (white bars ZnT8<sup>+/+</sup>, grey bars ZnT8<sup>-/-</sup>) or 1% ambient oxygen (dark grey bars ZnT8<sup>+/+</sup>, black bars ZnT8<sup>-/-</sup>) for 24 hours. Total RNA was extracted, and qRT-PCR analysis of *Pdx1*, *Slc16a3*, *Gck*, *Slc2a1*, *Slc2a2*, *Pfk* (Phosphofructokinase), *Vegfa* (Vascular endothelial growth factor A), *Pdk1* (Pyruvate dehydrogenase kinase 1) and *Ldha* (Lactate dehydrogenase A) was performed (fold expression, normalisation to cyclophilin). Bars represent mean  $\pm$  S.E. \*,  $p < 0.05$ ; \*\*,  $p < 0.01$ ; \*\*\*,  $p < 0.001$
