# Supplementary material for: Hypoxia lowers SLC30A8/ZnT8 expression and free cytosolic Zn2+ in pancreatic beta cells
Source: PubMed Central journal article supplement (PMC4079946; doi:10.1007/s00125-014-3266-0), 2014-05-28
Supplement: 125_2014_3266_MOESM8_ESM.pdf [file 125_2014_3266_MOESM8_ESM.pdf]

## ESM Figure 6

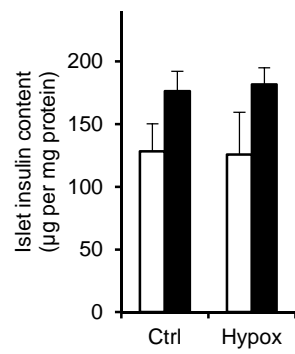

**Effect of hypoxia on insulin content.** Insulin content in ZnT8<sup>+/+</sup> (white bars) and ZnT8<sup>-/-</sup> mice (black bars) was measured by acid alcohol extraction after 24 h of exposure to 21% (Ctrl) or 1% (Hypox) ambient oxygen. Bars represent mean  $\pm$  S.E., n.s.
