# Supplementary material for: Hypoxia lowers SLC30A8/ZnT8 expression and free cytosolic Zn2+ in pancreatic beta cells
Source: PubMed Central journal article supplement (PMC4079946; doi:10.1007/s00125-014-3266-0), 2014-05-28
Supplement: 125_2014_3266_MOESM9_ESM.pdf [file 125_2014_3266_MOESM9_ESM.pdf]

## ESM Figure 7

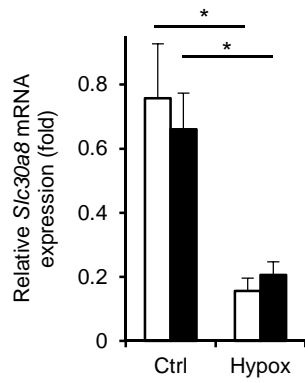

**Effect of ZnCl<sub>2</sub> on the expression of *Slc30a8*.** CD1 mouse islets were incubated in the presence of 0 (white bars) or 30  $\mu\text{M}$  (black bars) ZnCl<sub>2</sub> during normoxia (Ctrl) or 1% ambient oxygen (Hypox) for 24 h. Total RNA was extracted, and qRT-PCR analysis of *Slc30a8* was performed. The mRNA levels were normalized to those of a housekeeping gene (cyclophilin). Bars represent mean  $\pm$  S.E. \*,  $p < 0.05$
