# Supplementary material for: Hypoxia lowers SLC30A8/ZnT8 expression and free cytosolic Zn2+ in pancreatic beta cells
Source: Springer Nature journal article supplement (doi:10.1007/s00125-014-3266-0), 2014-05-27
Supplement: MOESM5 [file 8092310]

### ESM Figure 3

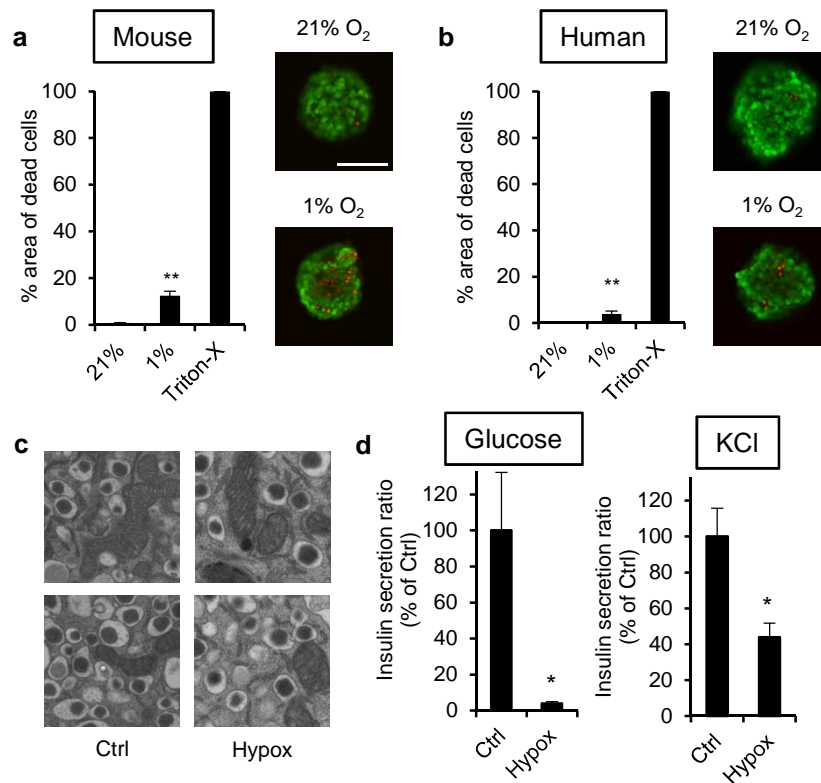

**Effect of hypoxia on cell death, cellular ultrastructure and insulin secretion.** (a) CD1 mouse and (b) human islets were incubated for 24 h at either 21%, 1% ambient oxygen, or treated with 1% Triton X-100 for 5 min. The percentage of dead cells within intact islets was assessed using calcein and propidium iodide staining. Scale bar, 100  $\mu$ m. (c) Electron micrographs of CD1 mouse islets after incubation for 24 h at either 21% or 1% ambient oxygen. (d) After 24 h of exposure to 21% (Ctrl) or 1% (Hypox) ambient oxygen, insulin secretion from CD1 mouse islets was assessed during exposure to high glucose (16.7 mM) or KCl (30mM), and the ratio of insulin secretion (fold change *versus* basal secretion at 3 mM glucose) was calculated and expressed as % of Ctrl. Bars represent mean  $\pm$  S.E. \*,  $p < 0.05$ ; \*\*,  $p < 0.01$
