# Supplementary material for: Hypoxia lowers SLC30A8/ZnT8 expression and free cytosolic Zn2+ in pancreatic beta cells
Source: Springer Nature journal article supplement (doi:10.1007/s00125-014-3266-0), 2014-05-27
Supplement: MOESM6 [file 8092310]

## ESM Figure 4

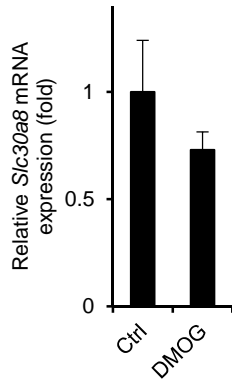

**Effect of HIF-1 $\alpha$  stabilization on the expression of *Slc30a8*.** CD1 mouse islets were incubated in the presence of 2mM Dimethylxalylglycine (DMOG) to induce stabilization of HIF-1 $\alpha$  in normoxia. Total RNA was extracted, and qRT-PCR analysis of *Slc30a8* was performed. The mRNA levels were normalized to those of a housekeeping gene (cyclophilin) and to the expression in islets not exposed to DMOG (control, Ctrl). Bars represent mean  $\pm$  S.E. p (ns).
